# Supplementary material
Source: PubMed Central journal article supplement (PMC4018662)
Supplement: NIHMS574502-supplement-1.pdf [file NIHMS574502-supplement-1.pdf]

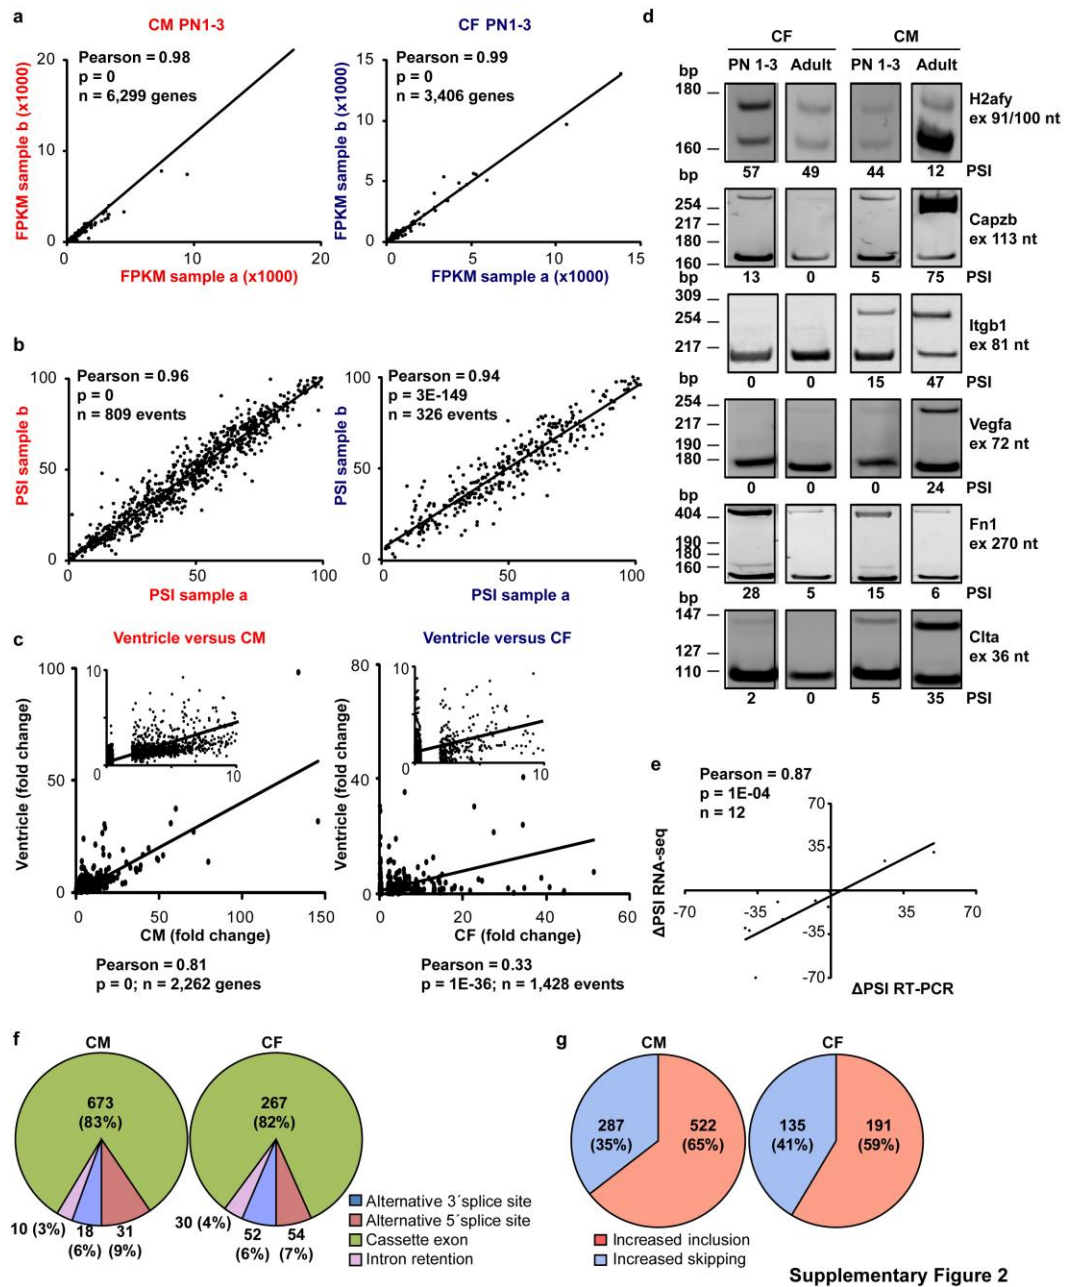

Supplementary Figure 2

### Supplementary Figure 2. Gene expression and AS transitions during CM and CF

**development by RNA-seq. a-b.** Analysis of CM (red) and CF (blue) duplicates (PN1-3) at the gene expression (a) or AS (b) levels. **c.** High correlation was detected between CM and ventricle gene expression changes during the first four week after birth (left panel). Similar analysis between CF and total ventricles showed a low correlation degree (right panel). **d.** Validation of AS transitions specifically in CM and CF during postnatal development by RT-PCR

( $n=2$  biological replicates). Images from all the lanes came from one gel. **e.** Correlation between RNA-seq and RT-PCR data on CM and CF splicing transitions. **f.** Splicing was analyzed by type of event (alternative 3' or 5' splice site, cassette exon or intron retention) from RNA-seq data ( $|\Delta\text{PSI}| \geq 20\%$  between adult and PN1-3). **g.** The same events were analyzed depending the developmental transition was an increment in inclusion of variable region in adult stage than in neonatal animals (increased inclusion) or a decrease (increased skipping). AS: alternative splicing. bp: base pairs. FPKM: fragments per kilobase per million mapped. PSI: percent spliced in.

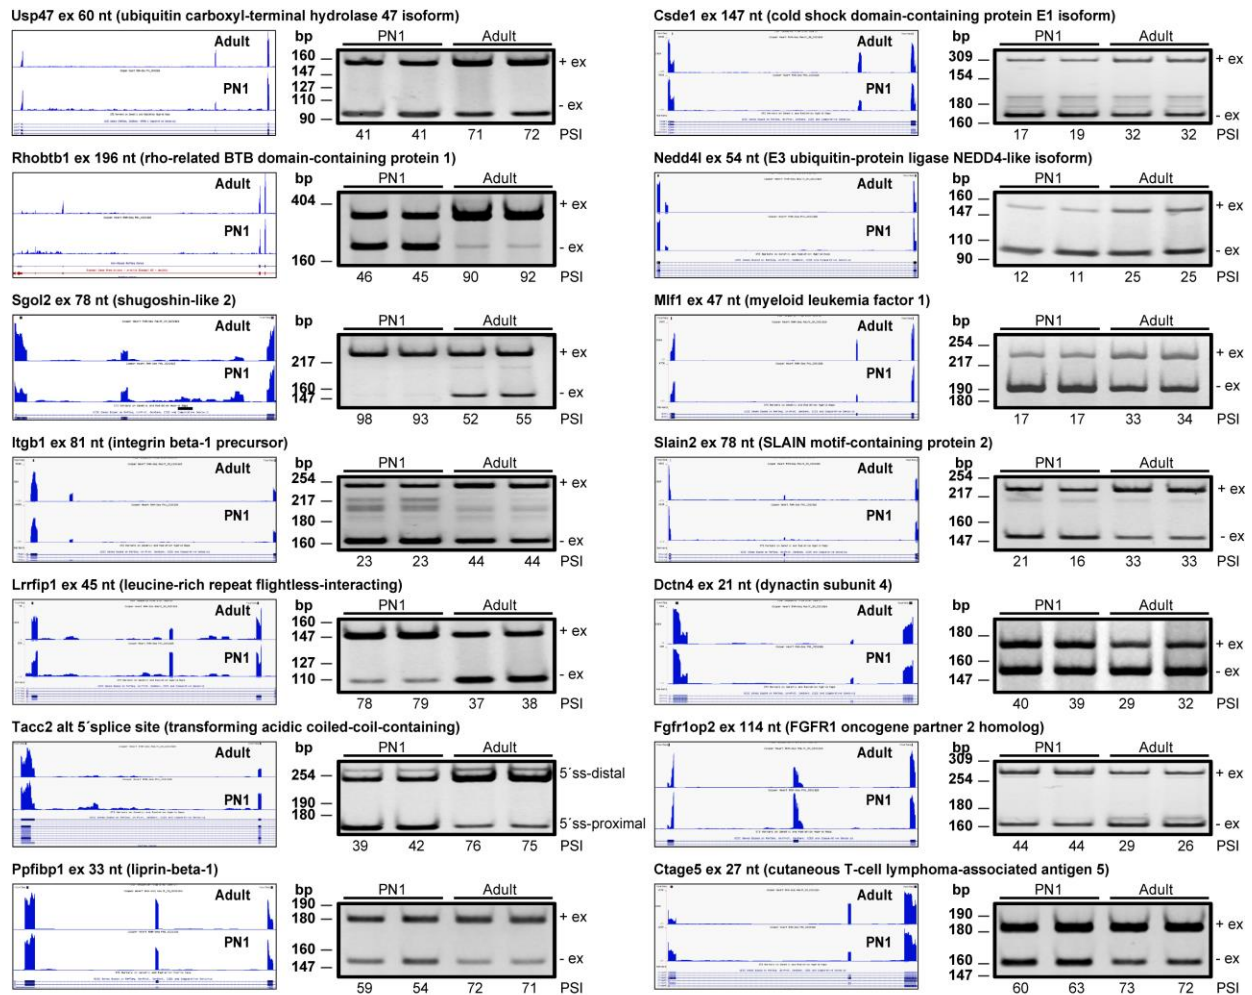

Supplementary Figure 3

**Supplementary Figure 3. Validation of AS transitions during heart development by RT-PCR.** RNA-seq data and RT-PCR validations ( $n=2$  biological replicates) for different AS transitions during development in ventricles (+ex: exon included; -ex: exon skipped). 5'ss: 5'splice site. bp: base pairs. PSI: percent spliced in.

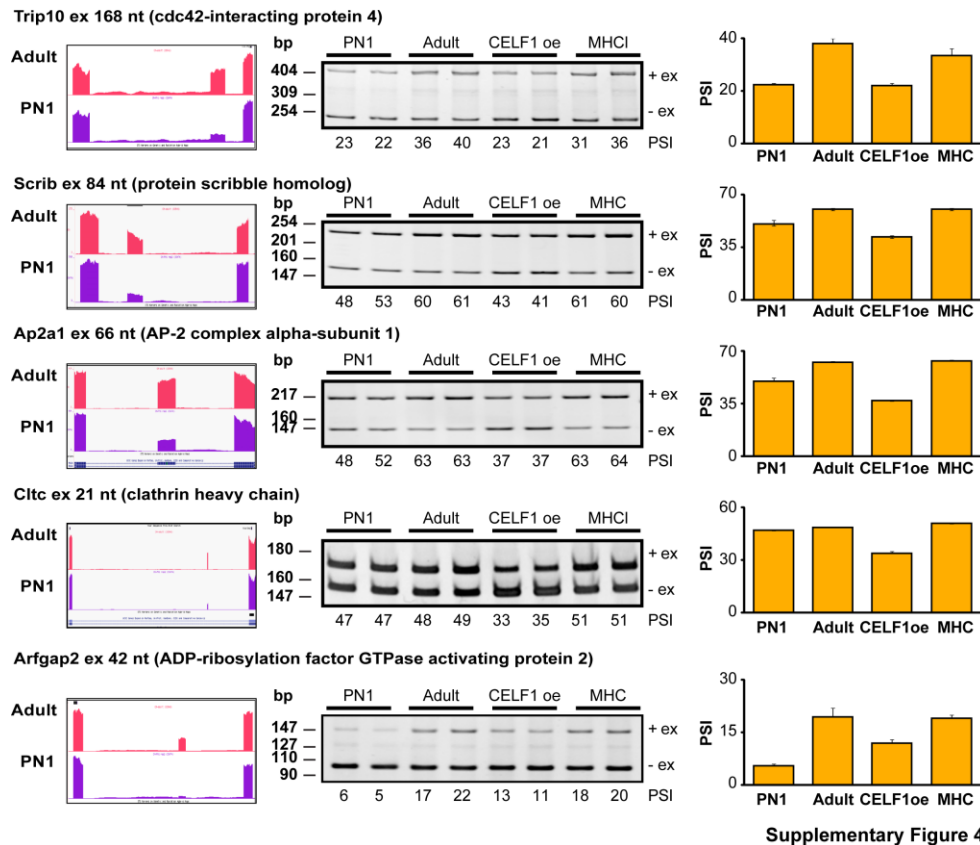

**Supplementary Figure 4. AS of vesicular traffic genes reverts back to neonatal pattern after CELF1 induction in adult hearts.** RT-PCR of AS events on genes involved in vesicle traffic during development and after CELF1 re-expression (CELF1 oe) in adult ventricles (+ex: exon included; -ex: exon skipped) ( $n=2$  biological replicates). Left panels show RNA-seq data displayed on the UCSC browser for each AS event. Graph bars: mean $\pm$ s.e.m ( $n=2$  biological replicates). bp: base pairs. MHC: control animals. PSI: percent spliced in.

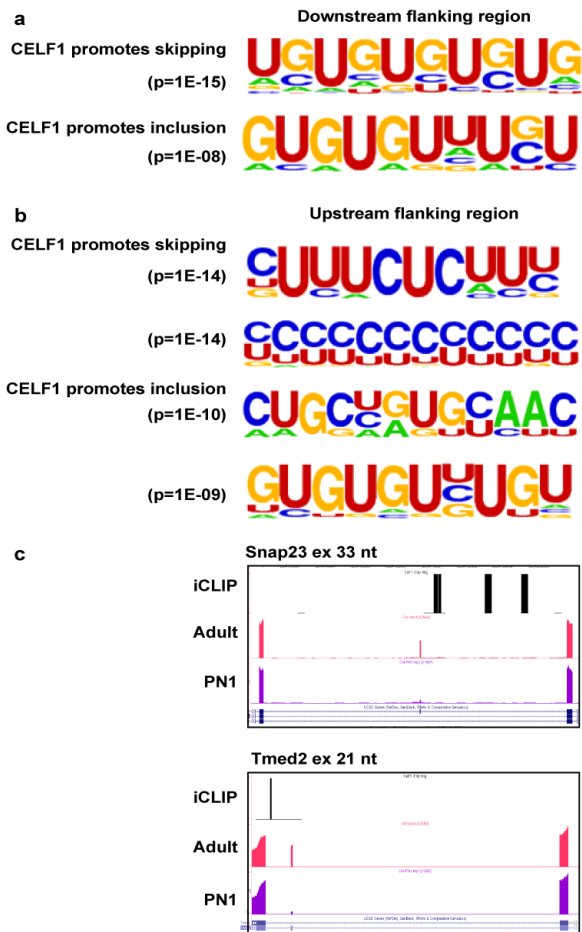

Supplementary Figure 5

**Supplementary Figure 5. Motif analysis of AS events regulated during development and responsive to CELF1 re-expression in adults. a-b.** AS events regulated during CM development and responsive to CELF1 re-expression in adult hearts were analyzed for motif enrichment within the 300 bp down- (a) and upstream (b) flanking regions. c. iCLIP-seq data from C2C12 differentiation were used to determine the presence of CELF1 binding sites within the flanking regions of CELF1-responsive AS events. Flanking intronic regions of the ex 33 nt from *Snap23* gene and the ex 21 nt from *Tmed2* gene are shown as examples with the iCLIP-tags.

## SUPPLEMENTARY TABLES

| RNA-seq of ventricles during development (rRNA depletion) |                       |                 |                |              |                    |
|-----------------------------------------------------------|-----------------------|-----------------|----------------|--------------|--------------------|
| Samples                                                   | Paired-end reads (nt) | # reads         | # Mapped reads | Mapping rate | Strand specificity |
| E17                                                       | 100 x 2               | 166,027,914 x 2 | 265,620,479    | 80.0 %       | 96.3 %             |
| PN1                                                       | 100 x 2               | 166,684,428 x 2 | 269,038,426    | 80.7 %       | 96.1 %             |
| PN10                                                      | 100 x 2               | 158,845,960 x 2 | 262,474,597    | 82.6 %       | 94.8 %             |
| PN28                                                      | 100 x 2               | 159,866,522 x 2 | 262,385,206    | 82.1 %       | 95.6 %             |
| PN90 (adult)                                              | 100 x 2               | 154,600,222 x 2 | 247,130,461    | 80.0 %       | 95.4 %             |
| RNA-seq of CM and CF during development (polyA-selection) |                       |                 |                |              |                    |
| Samples                                                   | Paired-end reads (nt) | # reads         | # Mapped reads | Mapping rate |                    |
| CF. PN1-3                                                 | 101 x 2               | 184,869,107 x 2 | 322,369,213    | 87.2 %       |                    |
| CF. PN1-2                                                 | 101 x 2               | 195,447,846 x 2 | 334,128,943    | 85.5 %       |                    |
| CF. PN28                                                  | 101 x 2               | 180,627,175 x 2 | 313,797,535    | 86.9 %       |                    |
| CF. PN60 (adult)                                          | 101 x 2               | 190,932,847 x 2 | 329,018,420    | 86.2 %       |                    |
| CM. PN1                                                   | 101 x 2               | 163,947,033 x 2 | 295,559,466    | 90.1 %       |                    |
| CM. PN1-2                                                 | 101 x 2               | 171,862,237 x 2 | 310,403,120    | 90.0 %       |                    |
| CM. PN30                                                  | 101 x 2               | 190,376,627 x 2 | 337,974,976    | 88.8 %       |                    |
| CM. PN67 (adult)                                          | 101 x 2               | 177,951,081 x 2 | 315,826,440    | 88.7 %       |                    |

**Supplementary Table 1.** Overall quality parameters of RNA-seq experiments on ventricles, CM and CF during mouse heart development. nt: nucleotides. rRNA: ribosomal RNA.

| CF             | Term                          | # genes | p      | - log p |
|----------------|-------------------------------|---------|--------|---------|
| Up-regulated   | immune response               | 90      | 2E-45  | 45      |
|                | cytokine signaling            | 16      | 1E-10  | 10      |
|                | chemotaxis                    | 21      | 1E-10  | 10      |
|                | cell proliferation regulation | 46      | 2E-09  | 9       |
|                | transcription regulation      | 28      | 2E-05  | 5       |
|                | cell adhesion molecules       | 15      | 3E-03  | 3       |
| Down-regulated | mitochondria                  | 158     | 9E-29  | 28      |
|                | electron transport chain      | 25      | 2E-10  | 10      |
|                | oxidation-reduction           | 60      | 1E-06  | 6       |
|                | cellular respiration          | 14      | 2E-06  | 6       |
|                | cardiac contraction           | 22      | 3E-11  | 11      |
|                | fatty acid metabolism         | 11      | 3E-05  | 5       |
| CM             | Term                          | # genes | p      | - log p |
| Up-regulated   | mitochondria                  | 483     | 2E-198 | 198     |
|                | oxidation-reduction           | 171     | 8E-49  | 48      |
|                | electron transport chain      | 60      | 6E-37  | 36      |
|                | cellular respiration          | 33      | 4E-21  | 20      |
|                | fatty acid metabolism         | 48      | 4E-14  | 13      |
|                | mitochondria organization     | 27      | 7E-09  | 8       |
|                | cardiac contraction           | 30      | 4E-12  | 11      |
| Down-regulated | transcription regulation      | 403     | 3E-17  | 16      |
|                | cell proliferation regulation | 118     | 7E-10  | 9       |
|                | splicing                      | 53      | 2E-07  | 7       |
|                | cytokine production           | 41      | 2E-07  | 7       |
|                | adherens junction             | 32      | 2E-09  | 9       |
|                | chemokine signaling           | 48      | 3E-06  | 6       |
|                | endocytosis                   | 46      | 2E-04  | 4       |
|                | ECM-receptor interaction      | 19      | 2E-02  | 2       |

**Supplementary Table 2.** GO analysis summary of down- and up-regulated genes performed for the RNA-seq data from CM and CF (PN1-3 versus adult).



| Gene symbol          | loci                     | $\Delta$ PSI |         |
|----------------------|--------------------------|--------------|---------|
|                      |                          | RT-PCR       | RNA-seq |
| <b>4932438A13Rik</b> | chr3:36921305-36925265   | -3%          | -27%    |
| <b>ap2a1</b>         | chr7:52158208-52158343   | 7%           | 13%     |
| <b>Arfgap1</b>       | chr2:180702239-180702519 | -13%         | -13%    |
| <b>arhgap17</b>      | chr7:130428933-130428981 | 1%           | 7%      |
| <b>Cacna2d1</b>      | chr5:15828356-15828413   | 14%          | 33%     |
| <b>Ctfa</b>          | chr4:44044271-44044307   | 18%          | 14%     |
| <b>cltc</b>          | chr11:86509151-86509192  | 3%           | 8%      |
| <b>Csde1</b>         | chr3:102840497-102840644 | 14%          | 33%     |
| <b>Ctage5_27</b>     | chr12:60247322-60247349  | 11%          | 28%     |
| <b>Dctn4</b>         | chr18:60705010-60705031  | -9%          | -25%    |
| <b>eps15L1</b>       | chr8:74880062-74880110   | 20%          | 16%     |
| <b>erc1</b>          | chr6:119723751-119729650 | 6%           | 0%      |
| <b>Fgfr1op2</b>      | chr6:146541155-146541269 | -17%         | -28%    |
| <b>Frmf6</b>         | chr12:71978226-71978250  | -11%         | -20%    |
| <b>gapvd1</b>        | chr2:34572772-34572835   | 5%           | 3%      |
| <b>Heatr7a</b>       | chr15:76262801-76262828  | -7%          | -1%     |
| <b>Itgb1</b>         | chr8:131250882-131250963 | 21%          | 33%     |
| <b>itsn2</b>         | chr12:4647718-4647799    | 4%           | 8%      |
| <b>Kif3a</b>         | chr11:53404218-53404227  | -42%         | -55%    |
| <b>Lrrfip1</b>       | chr1:92987031-92987076   | -41%         | -34%    |
| <b>Mif1</b>          | chr3:67194899-67194944   | 16%          | 36%     |
| <b>Ndrf4</b>         | chr8:98236224-98236263   | 34%          | 48%     |
| <b>Nedd4l</b>        | chr18:65341136-65341190  | 14%          | 31%     |
| <b>Plekha6</b>       | chr1:135171369-135171456 | 12%          | 31%     |
| <b>Ppfibp1</b>       | chr6:146948183-146948216 | 14%          | 25%     |
| <b>Rhobtb1</b>       | chr10:68682194-68682287  | 45%          | 86%     |
| <b>Scrib</b>         | chr15:75892168-75892231  | -17%         | -14%    |
| <b>Sgol2</b>         | chr1:58056807-58059823   | -42%         | -20%    |
| <b>Slain2</b>        | chr5:73357042-73357120   | 22%          | 32%     |
| <b>Spna2</b>         | chr2:29869677-29869692   | 22%          | 35%     |
| <b>Tacc2</b>         | chr7:137878664-137878742 | 31%          | 28%     |
| <b>Tmed2</b>         | chr5:124993495-124993516 | 31%          | 53%     |
| <b>Tmem188</b>       | chr8:90648980-90649054   | -16%         | -29%    |
| <b>Tnnt2</b>         | chr1:137746955-137746964 | 31%          | 52%     |
| <b>Traf6</b>         | chr2:101520982-101521184 | 30%          | 49%     |
| <b>Usp47</b>         | chr7:119190440-119190500 | 31%          | 51%     |

**Supplementary Table 3.** Developmentally AS transitions detected by RNA-seq and validated by RT-PCR.

| Gene symbol                                      | id                             | loci                      | ΔPSI             |                     |                    |
|--------------------------------------------------|--------------------------------|---------------------------|------------------|---------------------|--------------------|
|                                                  |                                |                           | Adult-PN1/3 (CM) | Mbn1 (wild type-KO) | CELF1 (control-oe) |
| <b>Antagonistic regulation by Mbn1 and CELF1</b> |                                |                           |                  |                     |                    |
| <i>1110007C09Rik</i>                             | CA-CA-13-49299297-49299357.0   | chr13:49299086-49300714   | -24%             | 16%                 | 16%                |
| <i>4833439L19Rik</i>                             | CA-CA-13-54665545-54665633.1   | chr13:54663053-54666717   | -41%             | -27%                | -27%               |
| <i>Abi1</i>                                      | CA-CA-2-22818733-22818748.0    | chr2:22817920-22826779    | 36%              | 18%                 | 29%                |
| <i>Aplp2</i>                                     | CA-CA-9-30963774-30963810.0    | chr9:30960998-30965432    | 24%              | 17%                 | 18%                |
| <i>Arfp1</i>                                     | CA-CA-3-84333091-84333187.0    | chr3:84331607-84338617    | 31%              | 63%                 | 14%                |
| <i>Arhgef9</i>                                   | CA-CA-X-92249567-92249629.0    | chrX:92246861-92250350    | -30%             | -30%                | -36%               |
| <i>Atp11a</i>                                    | CA-CA-8-12863758-12863862.0    | chr8:12859313-12868728    | 21%              | 43%                 | 16%                |
| <i>Bnip3l</i>                                    | CA-CA-14-67607736-67607778.0   | chr14:67604075-67608121   | 28%              | 17%                 | 38%                |
| <i>Bptf</i>                                      | CA-CA-11-106956315-106956504.0 | chr11:106943826-106957239 | 34%              | 14%                 | 12%                |
| <i>Cd99l2</i>                                    | CA-CA-X-68703113-68703182.0    | chrX:68694248-68703848    | -28%             | -20%                | -16%               |
| <i>Clt</i>                                       | CA-CA-4-44044271-44044307.1    | chr4:44038320-44045718    | 26%              | 15%                 | 22%                |
| <i>Ctage5</i>                                    | CA-CA-12-60247322-60247349.0   | chr12:60245685-60247944   | 36%              | 28%                 | 24%                |
| <i>D19Wsu162e</i>                                | CA-CA-19-46681201-46681249.0   | chr19:46673618-46718945   | -24%             | 28%                 | 27%                |
| <i>Dcun1d2</i>                                   | CA-CA-8-13258946-13259043.0    | chr8:13255962-13271720    | 35%              | -10%                | -20%               |
| <i>Erb2ip</i>                                    | CA-CA-13-104617986-104618103.1 | chr13:104614799-104625108 | 25%              | 10%                 | 15%                |
| <i>Exoc7</i>                                     | CA-CA-11-116158884-116158977.0 | chr11:116156857-116161747 | 27%              | -18%                | -16%               |
| <i>Fbln2</i>                                     | CA-CA-6-91209623-91209764.0    | chr6:91207718-91213467    | 63%              | 13%                 | 18%                |
| <i>Fgfr1</i>                                     | CA-CA-8-26665979-26666246.0    | chr8:26642721-26668286    | -27%             | -22%                | -12%               |
| <i>Gnas</i>                                      | CA-CA-2-174162247-174162292.0  | chr2:174159712-174167208  | -23%             | -10%                | -20%               |
| <i>Gopc</i>                                      | CA-CA-10-52077147-52077171.0   | chr10:52074377-52078743   | 28%              | 16%                 | 10%                |
| <i>Immt</i>                                      | CA-CA-6-71803166-71803262.1    | chr6:71802723-71807042    | -20%             | -10%                | -19%               |
| <i>Kif21a</i>                                    | CA-CA-15-90779436-90779475.0   | chr15:90774195-90786940   | 35%              | 10%                 | 14%                |
| <i>Lpin1</i>                                     | CA-CA-12-16577969-16578068.0   | chr12:16575195-16580591   | 21%              | 11%                 | 38%                |
| <i>Map4k4</i>                                    | CA-CA-1-40065175-40065184.0    | chr1:40064277-40066708    | 34%              | 17%                 | 18%                |
| <i>Mark2</i>                                     | CA-CA-19-7354475-7354502.0     | chr19:7352531-7355745     | 28%              | -17%                | -15%               |
| <i>Mbnl2</i>                                     | CA-CA-14-120803859-120803954.0 | chr14:120795672-120830919 | -44%             | -15%                | -24%               |
| <i>Nab2</i>                                      | CA-CA-10-127099786-127099978.0 | chr10:127097973-127100320 | 26%              | 11%                 | 18%                |
| <i>Palm</i>                                      | CA-CA-10-79279536-79279668.0   | chr10:79277929-79283641   | 31%              | 15%                 | 12%                |
| <i>Ppp3cb</i>                                    | CA-CA-14-21322468-21322498.0   | chr14:21319089-21327943   | 44%              | 15%                 | 19%                |
| <i>R3hdm2</i>                                    | CA-CA-10-126918748-126918850.0 | chr10:126913575-126921274 | 39%              | 12%                 | 41%                |
| <i>Rps24</i>                                     | CA-CA-14-25312838-25312841.0   | chr14:25312604-25312988   | 26%              | 18%                 | 25%                |
| <i>Tnrc6b</i>                                    | CA-CA-15-80713373-80713532.0   | chr15:80709296-80714812   | 27%              | 19%                 | 30%                |
| <i>Usp15</i>                                     | CA-CA-10-122590096-122590183.0 | chr10:122583849-122605428 | 35%              | -14%                | -19%               |
| <i>Zfp346</i>                                    | CA-CA-13-55231894-55231988.0   | chr13:55223690-55236186   | 28%              | 25%                 | 19%                |
| <i>Zfp672</i>                                    | CA-CA-11-58133368-58133456.0   | chr11:58132825-58136231   | 20%              | -28%                | -31%               |
| <b>Same regulation by Mbn1 and CELF1</b>         |                                |                           |                  |                     |                    |
| <i>4833439L19Rik</i>                             | CA-CA-13-54665875-54665982.3   | chr13:54663053-54666664   | -58%             | -34%                | 37%                |
| <i>Ankhd1</i>                                    | CA-CA-18-36784162-36784921.0   | chr18:36774368-36791866   | -33%             | 33%                 | -14%               |
| <i>Ap1b1</i>                                     | CA-CA-11-4933244-4933265.0     | chr11:4932420-4933845     | 32%              | -30%                | 22%                |
| <i>Ccnc</i>                                      | CA-CA-4-21674629-21674723.0    | chr4:21673802-21677693    | 28%              | -10%                | 12%                |
| <i>Ctsa</i>                                      | CA-CA-2-164659223-164659350.0  | chr2:164658372-164659708  | -37%             | 10%                 | -37%               |
| <i>Dmtf1</i>                                     | CA-CA-5-9126539-9126749.0      | chr5:9124441-9128108      | 30%              | -20%                | 23%                |
| <i>Ehbp111</i>                                   | CA-CA-19-5720971-5721007.0     | chr19:5720808-5721584     | 45%              | -16%                | 36%                |
| <i>Enah</i>                                      | AA-AA-1-183851899-183852631.0  | chr1:183851788-183853971  | -28%             | -16%                | 28%                |
| <i>Fbxo25</i>                                    | CA-CA-8-13938921-13938948.0    | chr8:13935145-13940521    | 40%              | -15%                | 25%                |
| <i>Fez2</i>                                      | CA-CA-17-78786330-78786411.0   | chr17:78784083-78800238   | 29%              | -11%                | 16%                |
| <i>Golga2</i>                                    | CA-CA-2-32152145-32152241.0    | chr2:32148834-32152528    | -22%             | -19%                | 31%                |
| <i>Lsm14b</i>                                    | CA-CA-2-179763662-179763779.0  | chr2:179762604-179766233  | 25%              | -12%                | 32%                |

|                      |                               |                          |      |      |      |
|----------------------|-------------------------------|--------------------------|------|------|------|
| <b><i>Mast2</i></b>  | CA-CA-4-116041340-116041389.0 | chr4:116025577-116064239 | 58%  | -19% | 25%  |
| <b><i>Mknk1</i></b>  | CA-CA-4-115527506-115527612.0 | chr4:115520824-115529738 | 30%  | -19% | 31%  |
| <b><i>Ndel1</i></b>  | CA-CA-11-68639671-68639706.0  | chr11:68635611-68643568  | 37%  | -27% | 35%  |
| <b><i>Ndrp2</i></b>  | CA-CA-14-52530760-52530802.0  | chr14:52530354-52531221  | 42%  | 15%  | -21% |
| <b><i>Phldb1</i></b> | CA-CA-9-44509028-44509169.0   | chr9:44507638-44511975   | 32%  | -22% | 15%  |
| <b><i>Psap</i></b>   | CA-CA-10-59760284-59760293.0  | chr10:59758693-59761977  | 40%  | -18% | 12%  |
| <b><i>Repin1</i></b> | CA-CA-6-48544860-48544975.0   | chr6:48543898-48549080   | -22% | 25%  | -17% |
| <b><i>Uap1</i></b>   | CA-CA-1-172078126-172078177.0 | chr1:172073527-172079590 | 33%  | -10% | 12%  |
| <b><i>Vegfa</i></b>  | CA-CA-17-46159225-46159297.0  | chr17:46157939-46161043  | 26%  | 10%  | -24% |
| <b><i>Zfp207</i></b> | CA-CA-11-80206585-80206678.0  | chr11:80205336-80208033  | 45%  | -18% | 29%  |

**Supplementary Table 4.** Developmentally AS transitions regulated by CELF1 and Mbnl1. AA: alternative 3' splice site. CA: alternative cassette exon. Chr: chromosome. KO: knock-out. Oe: CELF1-expressing mice. PSI: percent spliced in.

| CELF1 response (#events) | iCLIP-tags (#) within the upstream flanking region | iCLIP-tags (#) within the downstream flanking region | Total iCLIP-tags (#) |
|--------------------------|----------------------------------------------------|------------------------------------------------------|----------------------|
| Inclusion (13 events)    | 5                                                  | 2                                                    | 5                    |
| Skipping (58 events)     | 21                                                 | 27                                                   | 33                   |
| Total (71 events)        | 26                                                 | 29                                                   | 38 (54%)             |

**Supplementary Table 5.** iCLIP-tags present within the flanking intronic regions of AS exons regulated during CM development which responds to CELF re-expression in adults.

| Mouse | Genotype               | D;s (mm) | D;d (mm) | SV (vol) | EF (%) | FS (%) | IVSd (mm) | LVIDd (mm) | IVSs (mm) | LVIDs (mm) |
|-------|------------------------|----------|----------|----------|--------|--------|-----------|------------|-----------|------------|
| #1    | <i>MHC</i>             | 3.0      | 4.3      | 47       | 57     | 30     | 0.8       | 4.3        | 0.9       | 3.0        |
| #2    | <i>MHC</i>             | 2.5      | 3.9      | 43       | 66     | 36     | 0.7       | 3.8        | 0.8       | 2.5        |
| #3    | <i>TRECUGBP1 / MHC</i> | 3.6      | 4.6      | 41       | 43     | 21     | 0.8       | 4.5        | 0.9       | 3.7        |
| #4    | <i>TRECUGBP1 / MHC</i> | 3.6      | 4.2      | 25       | 31     | 14     | 0.7       | 4.2        | 0.7       | 3.6        |

**Supplementary Table 6.** Echocardiogram parameters of bitransgenic (*TRECUGBP1/MHC*) and *MHC* adult animals after four days on 2 g/kg doxycycline. EF: ejection fraction. FS: fractional shortening. IVSd: interventricular septal thickness at diastole. IVSs: interventricular septal thickness at systole. LVIDd: left ventricle internal diameter at diastole. LVIDs: left ventricle internal diameter at systole.

| Mouse | Genotype               | HR (bpm) | HRV (bpm) | CV (%) | RR (ms) | PQ (ms) | PR (ms) | QRS (ms) | QT (ms) | ST (ms) | QTC (ms) |
|-------|------------------------|----------|-----------|--------|---------|---------|---------|----------|---------|---------|----------|
| #1    | <i>MHC</i>             | 634      | 13        | 2.0    | 94.8    | 17.5    | 25.4    | 11.4     | 44.5    | 33.5    | 45.7     |
| #2    | <i>MHC</i>             | 663      | 14        | 2.1    | 90.6    | 12.6    | 18.3    | 9.8      | 48.7    | 39.5    | 51.3     |
| #3    | <i>TRECUGBP1 / MHC</i> | 590      | 12        | 2.0    | 101.8   | 23.4    | 30.6    | 10.5     | 34.0    | 24.0    | 33.7     |
| #4    | <i>TRECUGBP1 / MHC</i> | 323      | 3         | 0.9    | 185.7   | 30.8    | 46.4    | 23.3     | 95.1    | 72.3    | 69.8     |

**Supplementary Table 7.** Electrocardiogram parameters of bitransgenic (*TRECUGBP1/MHC*) and *MHC* adult animals after four days on 2 g/kg doxycycline. bpm: beats per minute. HR: heart rate. HRV: heart rate variability. ms: millisecond.

| Gene symbol           | id                            | AS region (nt) | Forward primer    |                          | Reverse primer    |                          |
|-----------------------|-------------------------------|----------------|-------------------|--------------------------|-------------------|--------------------------|
| <i>Rhobtb1</i>        | CA-CA-10-68682194-68682287.0  | 196            | <i>Rhobtb1-F</i>  | CGCAGGAACCTCCTGTTCTTC    | <i>Rhobtb1-R</i>  | CTCCTGGCAGACACGGTACT     |
| <i>Aak1</i>           | CA-CA-6-86933805-86933916.0   | 111            | <i>Aak1-F</i>     | CAAAGCTGATGTTGCTGTTGA    | <i>Aak1-R</i>     | CATCTTCTGCCACCTTTTCG     |
| <i>Kif3a</i>          | CA-CA-11-53404218-53404227.0  | 9              | <i>Kif3a-F</i>    | TGACATCAGTGGGTCAGAGG     | <i>Kif3a-R</i>    | GGTCCTTCTCCCCTCTCTCT     |
| <i>Tmed2</i>          | CA-CA-5-124993495-124993516.0 | 21             | <i>Tmed2-F</i>    | GGATGTCCACTATGACTCCAAA   | <i>Tmed2-R</i>    | TCCCGGACTTCCATGTACTC     |
| <i>Tnnt2</i>          | CA-CA-1-137746955-137746964.0 | 9              | <i>Tnnt2b-F</i>   | ACAGGAGGAAGGCCTGAGGAT    | <i>Tnnt2b-R</i>   | CTTCATTCCAGGTGGTCGATG    |
| <i>Usp47</i>          | CA-CS-7-119190440-119190500.0 | 60             | <i>Usp47-F</i>    | AGAACCAACTGGTCCCAGG      | <i>Usp47-R</i>    | GTTCACTCACTGTCTTCGAGTTAG |
| <i>Ndr4</i>           | CA-CA-8-98236224-98236263.0   | 39             | <i>Ndr4-F</i>     | CCAGGGAAGCTGACTGAGG      | <i>Ndr4-R</i>     | AGGGACGCGGTAACGTGAG      |
| <i>Mif1</i>           | CA-CA-3-67194899-67194944.0   | 47             | <i>Mif1-F</i>     | TGCACACCGAGAAAGTATGC     | <i>Mif1-R</i>     | TTCGCATATTTGCATCATC      |
| <i>Itgb1</i>          | CA-CA-8-131250882-131250963.0 | 81             | <i>Itgb1-F</i>    | TTCTTATTGGCCTTGCCCTTG    | <i>Itgb1-R</i>    | CTTCGGATTGACCACAGTTG     |
| <i>Lrrfip1</i>        | CA-CS-1-92987031-92987076.0   | 45             | <i>Lrrfip1-F</i>  | GGACTCTCCTGCTCCAACCT     | <i>Lrrfip1-R</i>  | CATAGAGGCTGCTCTCATCCA    |
| <i>Cacna2d1</i>       | CA-CA-5-15828356-15828413.0   | 57             | <i>Cacna2d1-F</i> | TCCAATGGCTACTATTTTGC     | <i>Cacna2d1-R</i> | TTCATTCTCTAACTCAGCATCGAG |
| <i>Csde1</i>          | CA-CA-3-102840497-102840644.0 | 147            | <i>Csde1-F</i>    | TCCTTTGGAACCTGTGCTGA     | <i>Csde1-R</i>    | AACCCAGTTTCCGAAGTG       |
| <i>Nedd4l</i>         | CA-CA-18-65341136-65341190.0  | 54             | <i>Nedd4l-F</i>   | CTGGCTGGGAAGAGAGGAT      | <i>Nedd4l-R</i>   | TGATGGCTGGGTCTGTAGTC     |
| <i>Sgol2</i>          | CA-CA-1-58058061-58058139.0   | 78             | <i>Sgol2-F</i>    | CTACCGAAAAGATGCAATTACAGA | <i>Sgol2-R</i>    | CAGGCTTGCACCTGCTTACTG    |
| <i>Tacc2</i>          | AD-AD-7-137878664-137878742.0 | 78             | <i>Tacc2-F</i>    | GCCAGAAGTGGACGTGTATG     | <i>Tacc2-R</i>    | GAGGAGCCAAGCTTTTCCAT     |
| <i>Dctn4</i>          | CA-CA-18-60705010-60705031.0  | 21             | <i>Dctn4-F</i>    | TTACCAGCAGCTTGCTCAGA     | <i>Dctn4-R</i>    | CCAGCAAGTGTACTGATGGATG   |
| <i>Frm6</i>           | AD-AD-12-71978226-71978250.0  | 24             | <i>Frm6-F</i>     | TGAACATGTATATGGAATTGTAC  | <i>Frm6-R</i>     | GATCAGCTTCCCATTCTCCA     |
| <i>Fgfr1op2</i>       | CA-CA-6-146541155-146541269.0 | 114            | <i>Fgfr1op2-F</i> | CAGTCTGCCCTGGAACCTGAT    | <i>Fgfr1op2-R</i> | TCATTACTGCTGCATCTCG      |
| <i>Pfibp1</i>         | CA-CA-6-146948183-146948216.0 | 33             | <i>Pfibp1-F</i>   | GAGCAACTGGAGGAGAAGGA     | <i>Pfibp1-R</i>   | TTCTTCATTGCTGCCATC       |
| <i>Heatr7a</i>        | CA-CA-15-76262801-76262828.0  | 27             | <i>Heatr7a-F</i>  | TGTCTGATCCTGTGCTACGG     | <i>Heatr7a-R</i>  | CACCAGCTCTGTTTCTCA       |
| <i>4932438 A13Rik</i> | AD-AD-3-36921396-36921954.0   | 63             | <i>13rik-F</i>    | GTTACAGCCGATCGAAGAGC     | <i>13rik-F</i>    | GTGGTTTTGGGAGAGCTGAA     |
| <i>Ctage5</i>         | CA-CA-12-60247320-60247349.0  | 27             | <i>Ctage5-F</i>   | TAAAGGAGGCCAGCTTTGAG     | <i>Ctage5-R</i>   | CAGCTCGTCTTGTTCAGAATG    |
| <i>Plekha6</i>        | CA-CA-1-135171369-135171456.1 | 87             | <i>Plekha6-F</i>  | ACCTAGCGCCCCTTTGAT       | <i>Plekha6-R</i>  | TGCTGGTCCAAATACTCTAGGTT  |
| <i>Tmem188</i>        | CA-CA-8-90648980-90649054.0   | 74             | <i>Tmem188-F</i>  | AATATATTCATTGCTTGCAACCTG | <i>Tmem188-R</i>  | AGCTAATAGTGA AAAACGGATGG |
| <i>Slain2</i>         | CA-CA-5-73357042-73357120.0   | 78             | <i>Slain2-F</i>   | CAAGTGCCAAATGAGGAAT      | <i>Slain2-R</i>   | TTGGCTACCAGAACCCAGAGC    |
| <i>Spna2</i>          | CA-CA-2-29869677-29869692.0   | 15             | <i>Spna2-F</i>    | TGAAGCCTGGATCAGTGAGA     | <i>Spna2-R</i>    | CTCAAAGGCTTGTGCTTCT      |
| <i>Eps15L1</i>        | CA-CA-8-74880062-74880110.0   | 48             | <i>Eps15l1-Fa</i> | GCAAATGGATCTTTGCCACT     | <i>Eps15l1-Ra</i> | ACAGGACACTCCCTCTCTGC     |
| <i>Scrib</i>          | CA-CS-15-75892168-75892231.0  | 63             | <i>Scrib-Fa</i>   | TGTAGGGGGTAGAGCCTTTTC    | <i>Scrib-Ra</i>   | GAGGAGGAGGAGGAGGAGAA     |
| <i>Traf6</i>          | CA-CA-2-101520982-101521184   | 203            | <i>Traf6-F</i>    | AAGCCTTCCCAGTTGTTGT      | <i>Traf6-R</i>    | GCAGTCACTGGAACGACTGG     |
| <i>Arfgap1</i>        | AA-AA-2-180702238-180702306.0 | 213 (281)      | <i>Arfgap1-F</i>  | CTAGTCCAGCTTGGCACCTC     | <i>Arfgap1-R</i>  | ATCCTGTGCCCGGACTTC       |
| <i>Clta</i>           | CA-CA-4-44043086-44043140.1   | 54+36          | <i>Clta-F</i>     | GGAGCTGGAAGAGTGGTATGC    | <i>Clta-R</i>     | CTGGGGATGACTCGTCAATG     |
| <i>Erc1</i>           | CA-CS-6-119728005-119728089.0 | 84             | <i>Erc1-Fa</i>    | GGAAGCTCTTTCAGCACCTCA    | <i>Erc1-Ra</i>    | GGGAGGAAGAGATGAAGCAA     |
| <i>Gapvd1</i>         | AD-AD-2-34572772-             | 63             | <i>Gapvd1-Fa</i>  | AGCTGCAGTGCTT            | <i>Gapvd1-Ra</i>  | AAACATGCAGCT             |

|                        |                               |    |                           |                              |                           |                          |
|------------------------|-------------------------------|----|---------------------------|------------------------------|---------------------------|--------------------------|
|                        | 34572835.0                    |    |                           | CAACTCC                      |                           | TTCGGATG                 |
| <b><i>Itsn2</i></b>    | CA-CA-12-4647718-4647799.0    | 93 | <b><i>Itsn2-Fa</i></b>    | GAAAAGGAAGAATT<br>ATGCCAAAGA | <b><i>Itsn2-Ra</i></b>    | TGTTCAAGGGCT<br>AACTGCTG |
| <b><i>Cltc</i></b>     | CA-CS-11-86509151-86509192.0  | 21 | <b><i>Cltc-Fa</i></b>     | GGGCTGTGTCTCT<br>GTAGCTTG    | <b><i>Cltc-Ra</i></b>     | CAGATGTCGTCC<br>TGGAAACC |
| <b><i>Arhgap17</i></b> | CA-CA-7-130428933-130428981.1 | 47 | <b><i>Arhgap17-Fa</i></b> | TGTCATTGTCTATG<br>TCCAGCAG   | <b><i>Arhgap17-Ra</i></b> | TTACATCCTCAGT<br>GCCACA  |
| <b><i>Ap2a1</i></b>    | IR-IR-7-52158208-52158343.0   | 66 | <b><i>Ap2a1-Fa</i></b>    | GAATGGGAGGGCC<br>TATGTC      | <b><i>Ap2a1-Ra</i></b>    | CCTCCTGGTGGA<br>TGCTTCT  |

**Supplementary Table 8.** Sequences of the primers (SIGMA) used for validation in ventricles.



| Gene symbol     | id                            | AS region (nt) | Forward primer    |                              | Reverse primer    |                               |
|-----------------|-------------------------------|----------------|-------------------|------------------------------|-------------------|-------------------------------|
| <i>Ap1b1</i>    | CA-CA-11-4933244-4933265.1    | 21             | <b>Ap1b1-F</b>    | TCAGCCTGATGTCA<br>TTCCCTG    | <b>Ap1b1-R</b>    | CTGATGGGTGCT<br>CCAAGTCT      |
| <i>Ap2a1</i>    | CA-CA-7-52158831-52158897.0   | 66             | <b>Ap2a1-F</b>    | GTAGGCGGGAACC<br>TCCTG       | <b>Ap2a1-R</b>    | TTATTCAACAGTT<br>CATCTGCTTCTG |
| <i>Arfgap1</i>  | CA-CA-2-180702239-180702519   | 213<br>(281)   | <b>Arfgap1-F</b>  | CTAGTCCAGCTTG<br>GCACCTC     | <b>Arfgap1-R</b>  | ATCCTGTGCCCG<br>GACTTC        |
| <i>Arfgap2</i>  | CA-CA-2-91109226-91109268.0   | 42             | <b>Arfgap2-F</b>  | CCTGAACAAGGCC<br>CTAACAC     | <b>Arfgap2-R</b>  | TAGCGGCTGCTG<br>GCTTCT        |
| <i>Arhgap17</i> | CA-CA-7-130437985-130438219.0 | 234            | <b>Arhgap17-F</b> | ATTTGTGCCACTTG<br>CTACCC     | <b>Arhgap17-R</b> | TCTGGTTGCTGTT<br>CCTTCT       |
| <i>Asap1</i>    | CA-CA-15-63942468-63942638    | 171            | <b>Asap1-F</b>    | CACAGATTTGCCCA<br>CATCAC     | <b>Asap1-R</b>    | ACAGCCCCTCAA<br>ACTTGTTG      |
| <i>Clta</i>     | CA-CA-4-44044271-44044307.1   | 54+36          | <b>Clta-F</b>     | GCGATAAAGGAGC<br>TGGAAGA     | <b>Clta-R</b>     | GTTTGCTGGACT<br>TGGGGTTA      |
| <i>Cltc</i>     | CA-CA-11-86514562-86514583.0  | 21             | <b>Cltc-F</b>     | GAAACCGCATGGA<br>GACATAA     | <b>Cltc-R</b>     | AAACAATGGGCT<br>GTGTCTCTG     |
| <i>Dnm1l</i>    | CA-CA-16-16341515-16341561    | 47<br>(+39)    | <b>Dnm1l-F</b>    | AGAGCTCAGTGCT<br>GGAAAGC     | <b>Dnm1l-R</b>    | TTTTCAATTTCTT<br>GTCGAATTTCA  |
| <i>Erc1</i>     | CA-CS-6-119728005-119728089.0 | 84             | <b>Erc1-F</b>     | GGGAGGAAGAGAT<br>GAAGCAA     | <b>Erc1-R</b>     | GGGACTCTTTCA<br>GCACCTCA      |
| <i>Gapvd1</i>   | AD-AD-2-34572772-34572835.0   | 63             | <b>Gapvd1-F</b>   | AAACATGCAGCTTT<br>CGGATG     | <b>Gapvd1-R</b>   | AGCTGCAGTGCT<br>TCAACTCC      |
| <i>Itsn2</i>    | CA-CA-12-4647718-4647799.0    | 93             | <b>Itsn2-F</b>    | GAAAAGGAAGAATT<br>ATGCCAAAGA | <b>Itsn2-R</b>    | TGTTCAAGGGCT<br>AACTGCTG      |
| <i>Mdm2</i>     | CA-CA-10-117146756-117146840  | 131 or<br>85   | <b>Mdm2-F</b>     | GGACCCTCTCGGA<br>TCACC       | <b>Mdm2-R</b>     | CGCTCCAACGGA<br>CTTTAACA      |
| <i>Nedd4l</i>   | CA-CA-18-65341136-65341190.0  | 54             | <b>Nedd4l-F</b>   | CTGGCTGGGAAGA<br>GAGGAT      | <b>Nedd4l-R</b>   | TGATGGCTGGGT<br>TCTGTAGTC     |
| <i>Scrib</i>    | CA-CA-15-75879886-75879970.0  | 84             | <b>Scrib-F</b>    | GACCACCGGAGGG<br>AAGAC       | <b>Scrib-R</b>    | CTGGGTAGCACT<br>GTTCTCAGG     |
| <i>Snap23</i>   | CA-CA-2-120416398-120416431.0 | 33             | <b>Snap23-F</b>   | AGAAGAAGGCATG<br>GACCAAA     | <b>Snap23-R</b>   | AGTTTGCTGAGG<br>CTGACCAT      |
| <i>Tmed2</i>    | CA-CA-5-124993495-124993516.0 | 21             | <b>Tmed2-F</b>    | GGATGTCCACTATG<br>ACTCCAAA   | <b>Tmed2-R</b>    | TCCCGGACTTCC<br>ATGTACTC      |
| <i>Traf6</i>    | CA-CA-2-101520982-101521184   | 203            | <b>Traf6-F</b>    | AAGCCTTCCCAGTT<br>GGTTGT     | <b>Traf6-R</b>    | GCAGTCACTGGA<br>CGACTGG       |
| <i>Trip10</i>   | CA-CA-17-57396282-57396450.0  | 168            | <b>Trip10-F</b>   | CCAGGGGACTTGG<br>AATTTG      | <b>Trip10-R</b>   | CCTTCTGCAACT<br>CTCGTTTC      |

**Supplementary Table 9.** Sequences of the primers (SIGMA) used for validation of AS events on vesicular trafficking related genes.
